# Supplementary material
Source: MDPI journal article supplement (https://www.mdpi.com/2220-9964/9/10/568)
Supplement: s1 [file s1]

**Appendix Table 1. Correlation matrix showing the multicollinearity between the variables**

|             | Developed land | Forest   | Water body | Cropland | Bare land | Pop_density | SUHII   |
|-------------|----------------|----------|------------|----------|-----------|-------------|---------|
| Forest      | -0.642**       |          |            |          |           |             |         |
| Water body  | -0.272*        | 0.576**  |            |          |           |             |         |
| Cropland    | -0.580**       | 0.692**  | 0.965**    |          |           |             |         |
| Bare land   | 0.650**        | 0.478**  | 0.484**    | 0.430**  |           |             |         |
| Pop_density | 0.484**        | -0.609** | -0.654**   | -0.769** | -0.372*   |             |         |
| SUHII       | 0.611**        | -0.579** | -0.602**   | -0.710** | -0.234*   | 0.705**     |         |
| SUHISE      | 0.578**        | -0.634** | -0.659**   | -0.785** | -0.362**  | 0.980**     | 0.788** |

Note: \* and \*\* denote significant at levels 0.01 and 0.05, respectively.
